# Supplementary material
Source: PubMed Central journal article supplement (PMC7460541)
Supplement: jz0c01287_si_001.pdf [file jz0c01287_si_001.pdf]

## *Supporting Information*

# **Strain and Charge Doping Fingerprints of the Strong Interaction between Monolayer MoS<sub>2</sub> and Gold**

Matěj Velický,<sup>\*1,2,3</sup> Alvaro Rodriguez,<sup>4</sup> Milan Bouša,<sup>4</sup> Andrey V. Krayev,<sup>5</sup> Martin Vondráček,<sup>6</sup> Jan Honolka,<sup>6</sup> Mahdi Ahmadi,<sup>2</sup> Gavin E. Donnelly,<sup>3</sup> Fumin Huang,<sup>3</sup> Héctor D. Abruña,<sup>2</sup> Kostya S. Novoselov,<sup>1,7,8</sup> and Otakar Frank<sup>\*4</sup>

<sup>1</sup> Department of Physics and Astronomy, University of Manchester, Oxford Road, Manchester, M13 9PL, United Kingdom

<sup>2</sup> Department of Chemistry and Chemical Biology, Cornell University, Ithaca, New York, 14853, United States

<sup>3</sup> School of Mathematics and Physics, Queen's University Belfast, University Road, Belfast, BT7 1NN, UK

<sup>4</sup> J. Heyrovský Institute of Physical Chemistry, Czech Academy of Sciences, Dolejškova 2155/3, 182 23 Prague, Czech Republic

<sup>5</sup> HORIBA Scientific, Novato, CA, 94949, United States

<sup>6</sup> Institute of Physics, Czech Academy of Sciences, Na Slovance 1999/2, 182 21 Prague 8, Czech Republic

<sup>7</sup> Centre for Advanced 2D Materials, National University of Singapore, 117546, Singapore

<sup>8</sup> Chongqing 2D Materials Institute, Liangjiang New Area, Chongqing, 400714, China

## **METHODS**

### **Sample Preparation**

Gold films on 90 nm SiO<sub>2</sub>/Si wafers (IDB Technologies Ltd) were prepared by three different methods: magnetron sputtering (CMS-A, Kurt J Lesker Company Ltd), e-beam evaporation (SC4500, CVC Products Inc), and thermal evaporation (DV502-A, Denton Vacuum Inc) followed by peeling from a sacrificial Si substrate.<sup>1</sup> Au thicknesses ranged from 3 to 100 nm and an adhesion layer of 1 nm or 3 nm Ti was employed for the sputtered and e-beam samples, respectively. MoS<sub>2</sub> was exfoliated onto the Au surface from bulk molybdenite crystals (Manchester Nanomaterials Ltd), using a low-stain tape, immediately after the removal of Au from the ultra-high vacuum deposition system. The bulk MoS<sub>2</sub> was peeled from the tape to expose the fresh MoS<sub>2</sub> surface immediately prior to the exfoliation. The samples were not treated in any other way before their characterization and were stored in a vacuum desiccator when not in use.

### **Characterization**

The exfoliated MoS<sub>2</sub> was inspected, and its thickness determined, using a Nikon L200N Eclipse optical microscope. MFP-3D AFM (Asylum Research) in tapping mode was used to determine the surface roughness. An Icon Dimension AFM (Bruker Corp.) in PeakForce tapping mode using Scanasyst-Air probes was employed for the high-resolution characterization of the surface. Far-field micro-Raman spectra were collected using an inVia Reflex confocal spectrometer (Renishaw plc) with a 532 nm laser and 2400 l/mm grating and LabRAM HR (Horiba Ltd) with a 633 nm laser and 1800 l/mm grating, focused to ~1 μm<sup>2</sup> spot size by a 100× objective. Near-field tip-enhanced Raman spectroscopy was measured using a LabRAM Nano system comprised of HR Evolution spectrometer and OmegaScope-R SPM/Optical system (HORIBA Scientific) with a 633 nm laser, 1800 l/mm grating, and Ag-coated Si tips (App Nano), using 1 s (3 s) integration time for mapping (tip force) measurements, respectively, and <300 μW laser power for each pixel. XPS, UPS, and PEEM were measured in NanoESCA microscope (Omicron). The XPS was collected using a monochromated Al Kα source (hν = 1486.7 eV), and the UPS was carried out using He I discharge lamp (hν = 21.2 eV). The XPS spectral calibration was done using the Au 4f<sub>7/2</sub> core level at 84 eV along with the Fermi level edge.

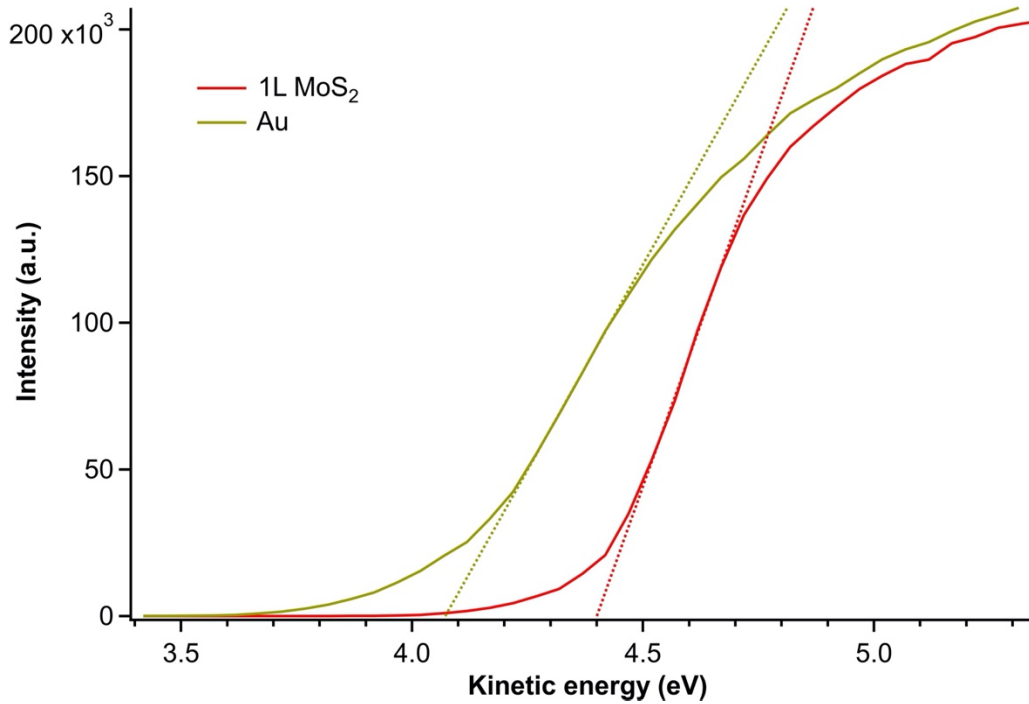

**Supporting Figure S1. Work function estimation using ultraviolet photoelectron spectroscopy.** Low kinetic energy cut-off spectra of 1L MoS<sub>2</sub> on Au (solid red; 15 nm e-beam) and of bare Au substrate (solid green) measured next to the MoS<sub>2</sub>, with the linear fits (dashed) through the inflection points of the curves. The work function ( $\Phi$ ) is determined from the value of the fitted line at zero intensity.  $\Phi_{\text{MoS}_2}$  was found to be  $\sim 0.3$  eV larger in comparison to  $\Phi_{\text{Au}}$ . Although the absolute  $\Phi$  values are burdened with uncertainty due to the spectrometer response, their difference yields a reliable work function difference estimate.

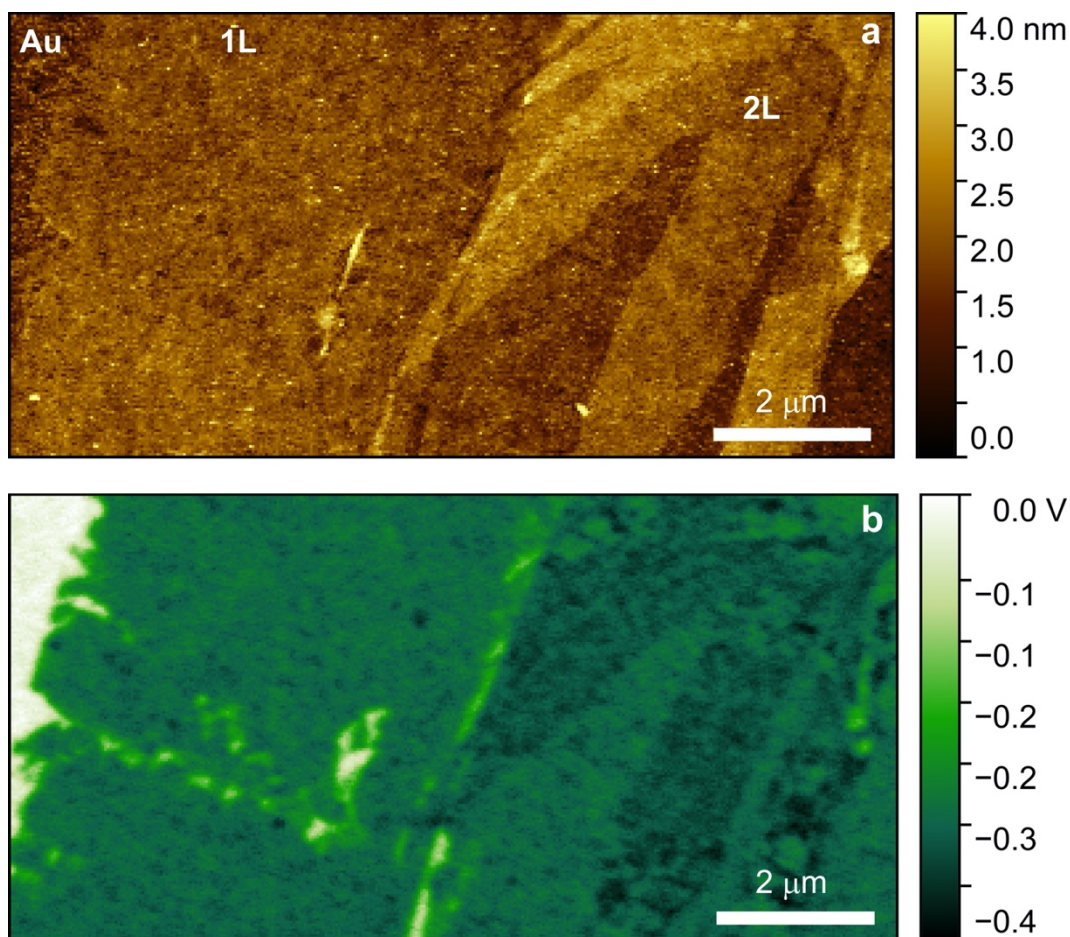

**Supporting Figure S2. Work function estimation using Kelvin probe force microscopy. a,** Topography atomic force microscopy image of an area containing 1L and 2L MoS<sub>2</sub> and the bare Au substrate (50 nm e-beam). **b,** Contact potential difference (CPD) map of **a**, obtained by Kelvin probe force microscopy. The CPD of 1L MoS<sub>2</sub> is lower, and therefore its  $\Phi$  is larger, than that of the Au substrate. The corresponding difference in the CPD of the two materials, averaged over the whole measured area, is 0.22 V. The trend of increasing work function (decreasing CPD) with the number of layers observed here for 1L/2L MoS<sub>2</sub> is consistent with other literature observations.<sup>2,3</sup>

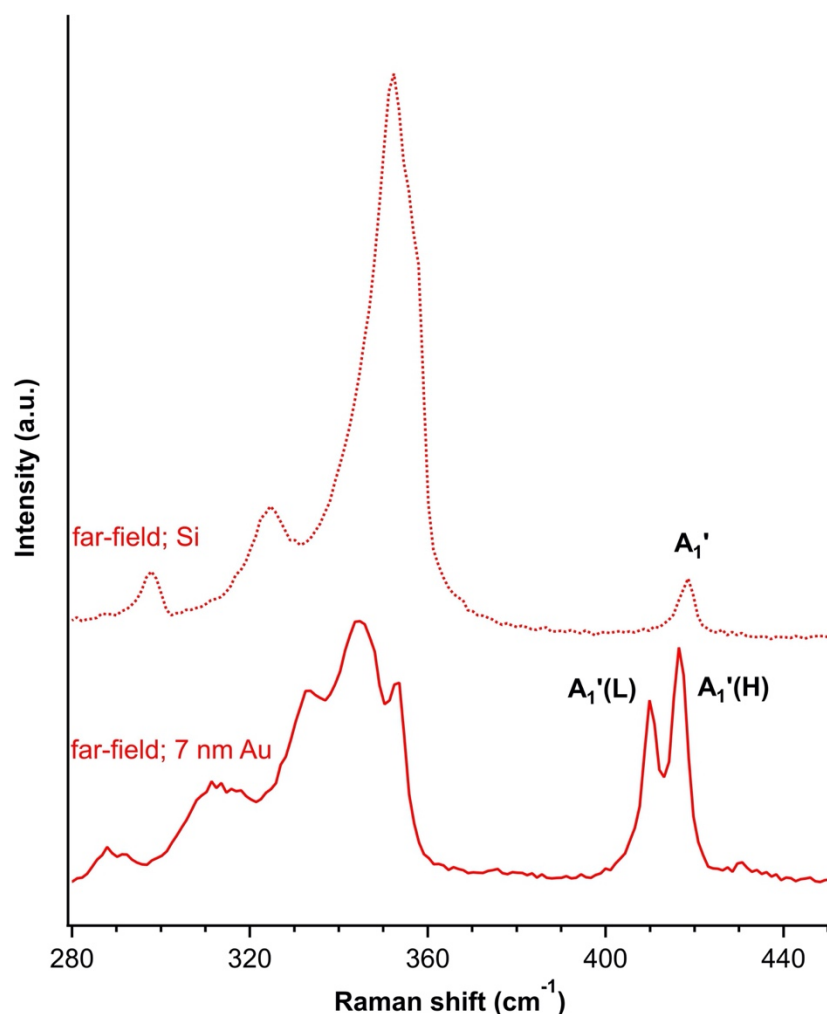

**Supporting Figure S3. Raman spectra of 1L WS<sub>2</sub>.** Micro-Raman spectra of 1L WS<sub>2</sub> on 7 nm sputtered Au (bottom curve) and on Si/SiO<sub>2</sub> (top curve), collected using 532 nm excitation.

### Supporting References

1. Krayev, A.; Bailey, C. S.; Jo, K.; Wang, S.; Singh, A.; Darlington, T.; Liu, G.-Y.; Gradecak, S.; Schuck, P. J.; Pop, E.; Jariwala, D. Dry Transfer of van der Waals Crystals to Noble Metal Surfaces To Enable Characterization of Buried Interfaces. *ACS Appl. Mater. Interfaces* **2019**, *11*, 38218-38225.
2. Kim, J. H.; Lee, J.; Kim, J. H.; Hwang, C. C.; Lee, C.; Park, J. Y. Work function variation of MoS<sub>2</sub> atomic layers grown with chemical vapor deposition: The effects of thickness and the adsorption of water/oxygen molecules. *Appl. Phys. Lett.* **2015**, *106*, 251606.
3. Choi, S.; Shaolin, Z.; Yang, W. Layer-number-dependent work function of MoS<sub>2</sub> nanoflakes. *J. Korean Phys. Soc.* **2014**, *64*, 1550-1555.
